# Supplementary material for: Endothelial dysfunction in small arteries and early signs of atherosclerosis in ApoE knockout rats
Source: Sci Rep. 2020 Sep 17;10:15296. doi: 10.1038/s41598-020-72338-3 (PMC7499202; doi:10.1038/s41598-020-72338-3)
Supplement: Supplementary file 1 — Supplementary Information [file 41598_2020_72338_MOESM1_ESM.pdf]

# **Phenotyping ApoE knockout rats on a Western diet: endothelial dysfunction in small arteries as early signs of atherosclerosis**

Simin Berenji Ardestani<sup>1,2</sup>, Ingrid Eftedal<sup>2,3</sup>, Michael Pedersen<sup>1</sup>, Per Bendix Jeppesen<sup>1</sup>, Rikke Nørregaard<sup>1</sup>, Vladimir V. Matchkov<sup>4</sup>

<sup>1</sup> Department of Clinical Medicine, Aarhus University, Denmark

<sup>2</sup> Department of Circulation and Medical Imaging, Faculty of Medicine and Health Sciences, NTNU Norwegian University of Science and Technology, Trondheim, Norway.

<sup>3</sup> Faculty of nursing and health sciences, Nord University, Bodø, Norway

<sup>4</sup> Department of Biomedicine, MEMBRANES, Health, Aarhus University, Aarhus, Denmark

## **Corresponding author**

Simin Berenji Ardestani, Department of Clinical Medicine,

Aarhus University,

Palle Juul Jensens Boulevard 99,

DK8200 Aarhus N, Denmark

[Email: Simin.berenji@clin.au.dk](mailto:Simin.berenji@clin.au.dk)

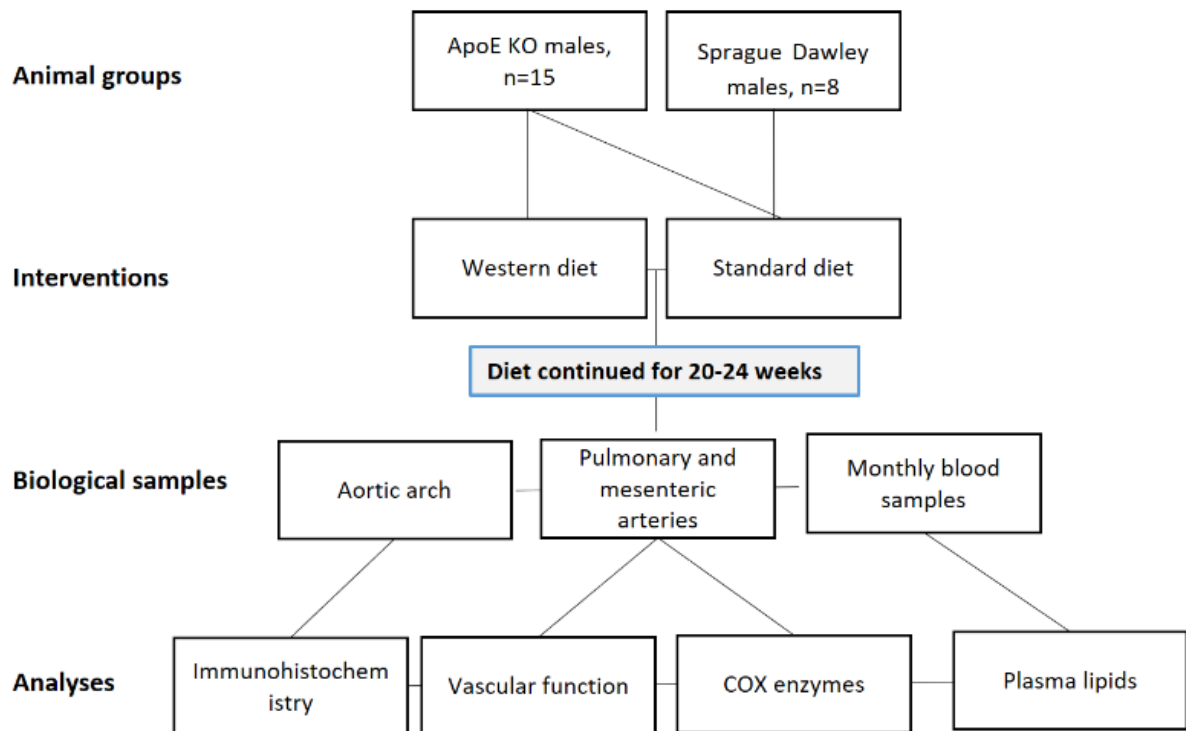

**Supplementary Figure S1. A summery chart of study design.** 15 male ApoE knockout (KO) rats and 8 Sprague Dawley rats were subjected to either a Western or standard diet for 20-24 weeks

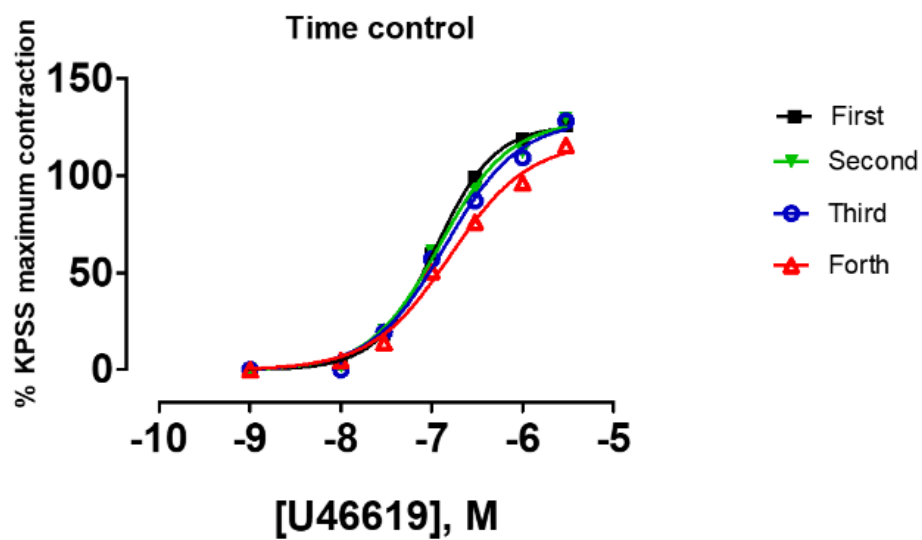

**Supplementary Figure S2. Time control in pulmonary arteries.** Percentage of contraction, expressed relative to the maximal contraction of KPSS, in response to U46619 in pulmonary arteries

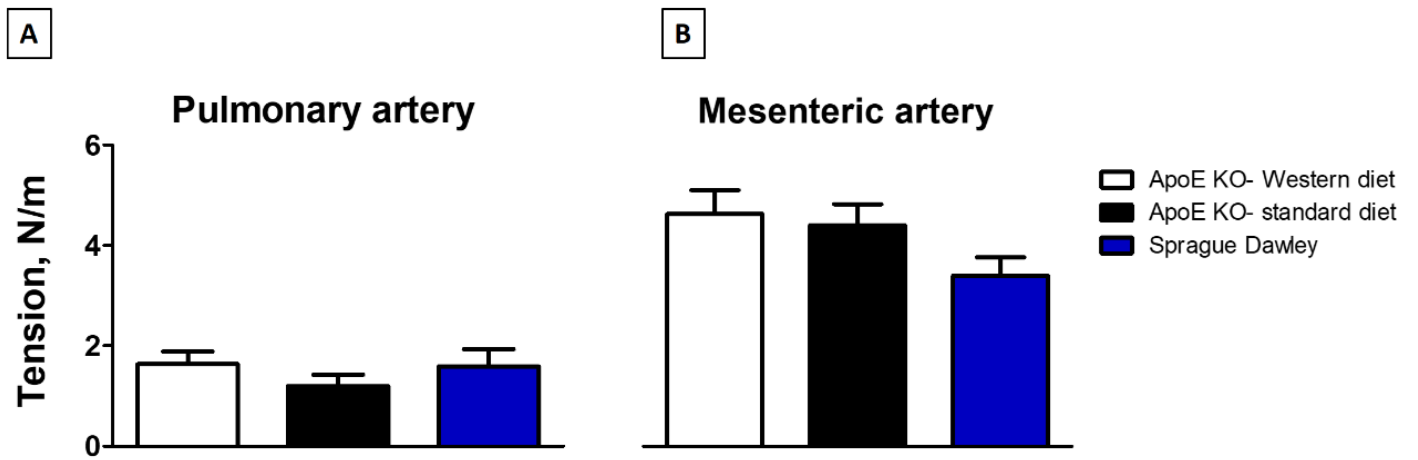

**Supplementary Figure S3. Maximal contraction in presence of KPSS.** (A) pulmonary (B) mesenteric arteries. KPSS, potassium physiological saline solution ANOVA, n=8, n=7.

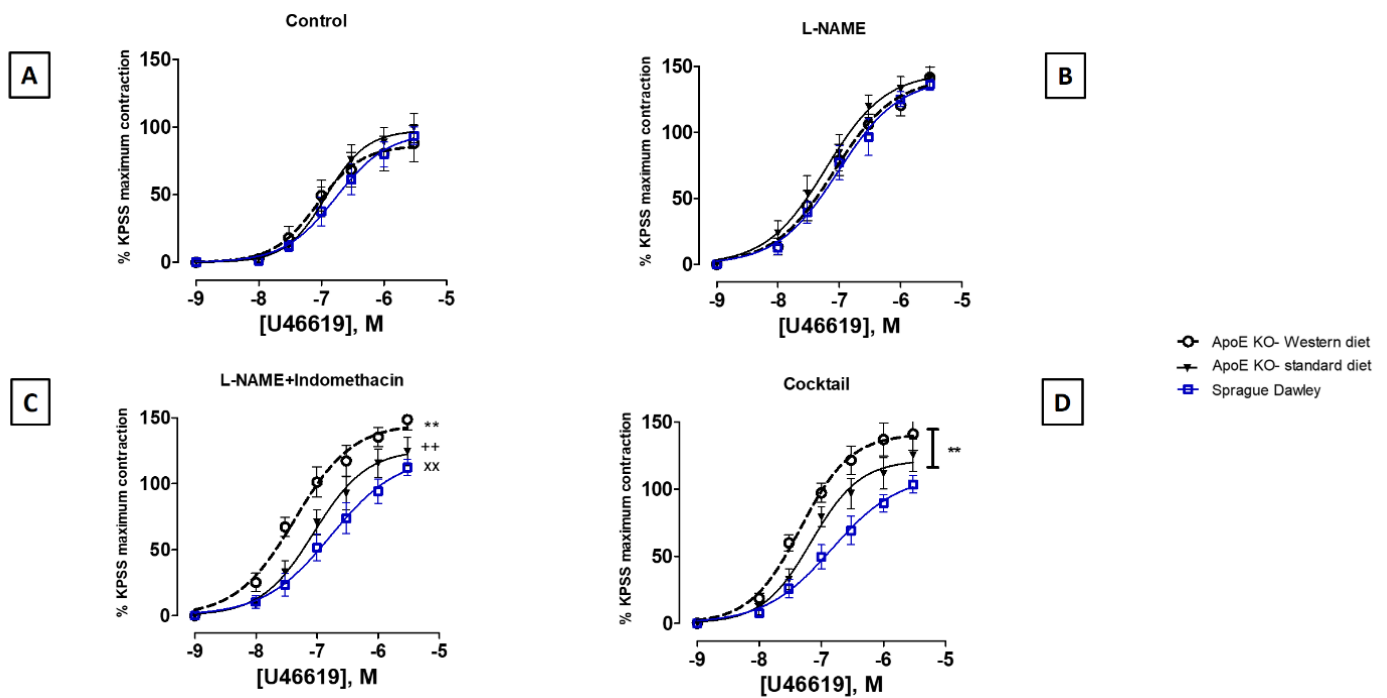

**Supplementary Figure S4. U46619 concentration-response curves of pulmonary arteries from different experimental groups under different conditions;** (A), Control conditions; (B), In the presence L-NAME (100  $\mu$ M); (C), After 20 min incubation with L-NAME (100  $\mu$ M) and indomethacin (3  $\mu$ M), (\*\*),  $P < 0.0001$  for ApoE KO- Western diet vs ApoE- control diet, (++) ,  $P = 0.09$ , ApoE KO- control diet vs Sprague Dawley, (xx),  $P < 0.0001$ , Sprague Dawley vs ApoE KO- Western diet; (D), The effect of 20 min incubation with Cocktail: L-NAME, indomethacin, TRAM-34 and apamin, i.e. pharmacological inhibition of all major pathways for endothelium-dependent relaxation, (\*\*),  $p = 0.001$ , ApoE KO- western diet vs ApoE Ko- control diet, (++) ,  $p < 0.001$ , ApoE KO- standard diet vs Sprague Dawley, (xx),  $P < 0.0001$ , Sprague Dawley vs ApoE KO- Western diet, F test,  $n = 8, 7$ .

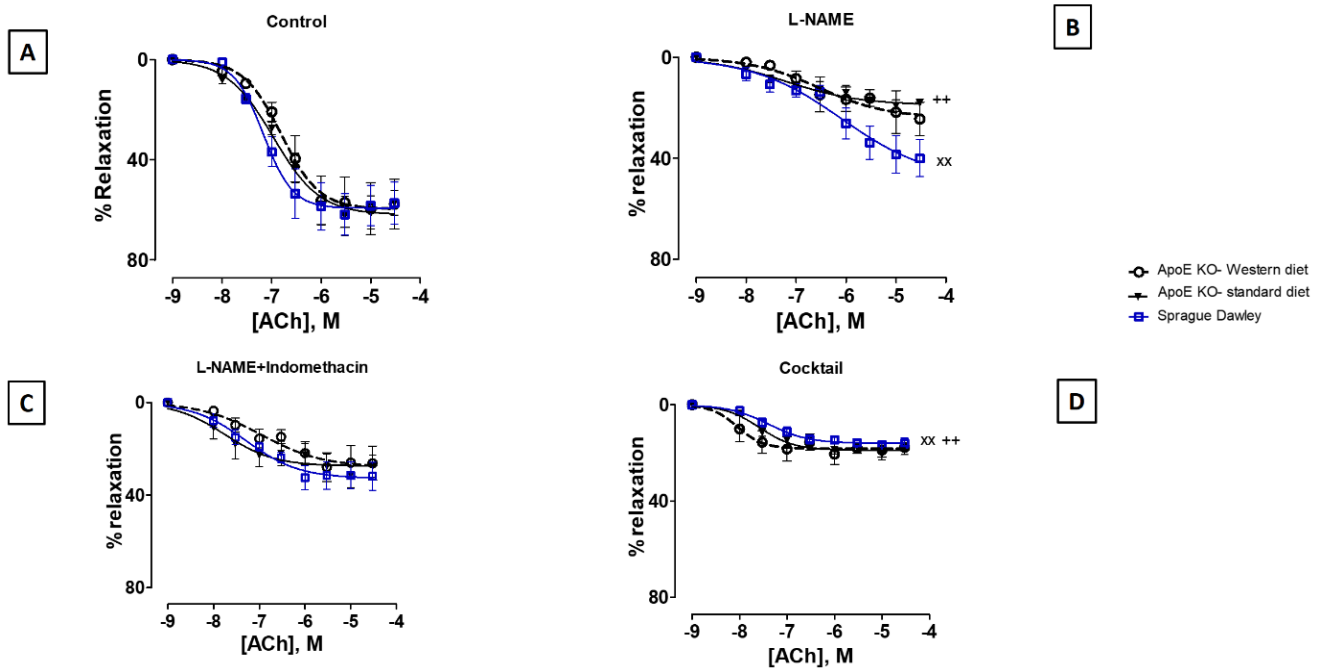

**Supplementary Figure S5. concentration-response curves of mesenteric arteries from different experimental groups under different conditions;** (A), Control conditions; (B), In the presence L-NAME (100  $\mu$ M), (++),  $P < 0.001$ , ApoE KO- control diet vs Sprague Dawley (xx),  $P = 0.003$ , Sprague Dawley vs ApoE KO Western diet; (C), After 20 min incubation with L-NAME (100  $\mu$ M) and indomethacin (3  $\mu$ M); (D), The effect of 20 min incubation with Cocktail: L-NAME, indomethacin, TRAM-34 and apamin, i.e. pharmacological inhibition of all major pathways for endothelium-dependent relaxation, (++),  $p < 0.002$ , ApoE KO standard diet vs Sprague Dawley, (xx),  $P < 0.002$ , Sprague Dawley vs ApoE KO Western diet,  $n = 8$ ,  $n = 7$ .

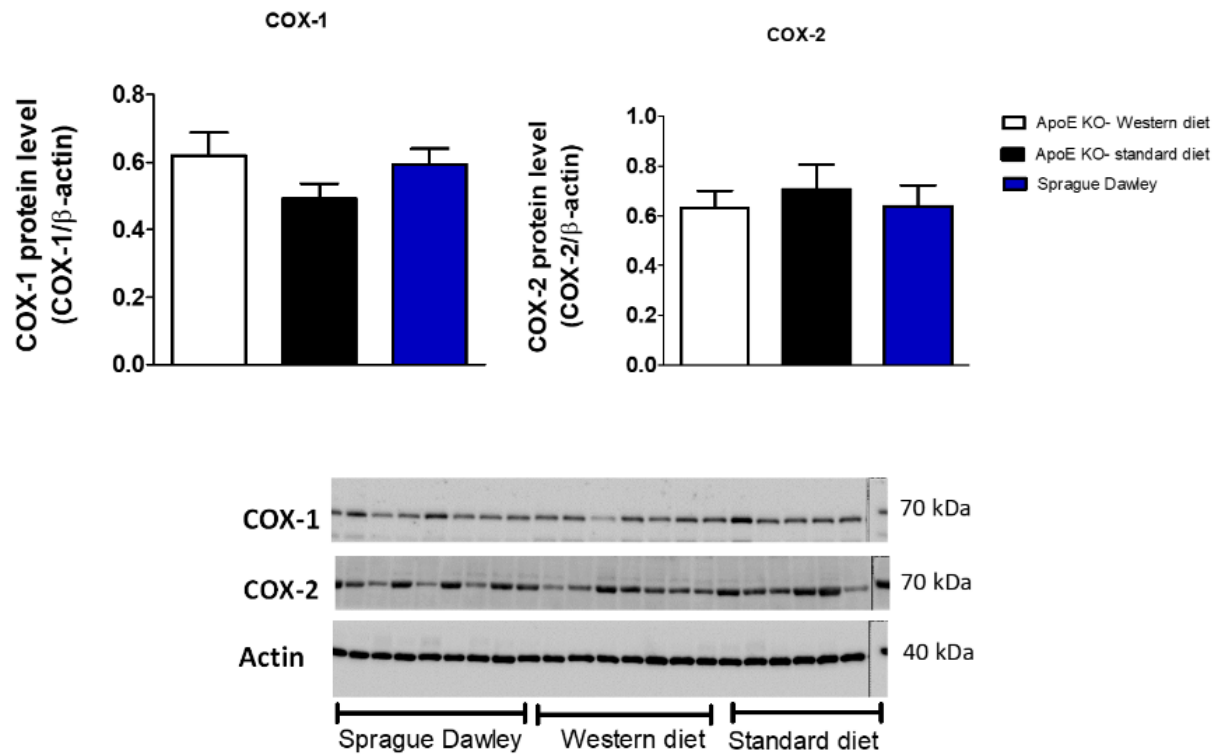

**Supplementary Figure S6. Relative expression of COX1 and COX 2.** Proteins quantified by Western blot and normalized to  $\beta$ -actin as loading control. ANOVA and t-test, n=8 ,7.
